# Supplementary material for: Genome-wide identification and characterisation of human DNA replication origins by initiation site sequencing (ini-seq)
Source: PubMed Central journal article supplement (PMC5137433; doi:10.1093/nar/gkw760), 2016-09-01
Supplement: supp_gkw760_nar-01731-v-2016-File010.pdf [file supp_gkw760_nar-01731-v-2016-File010.pdf]

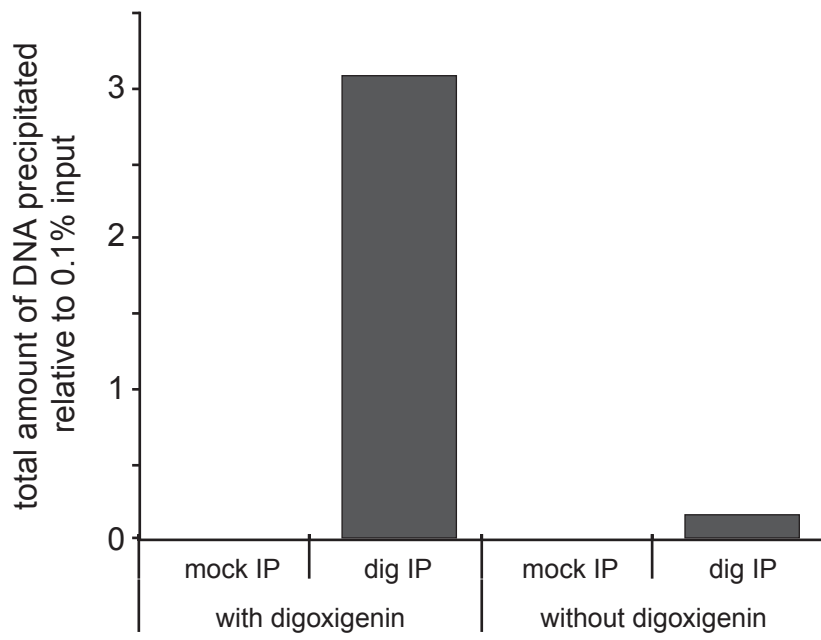

Figure S1

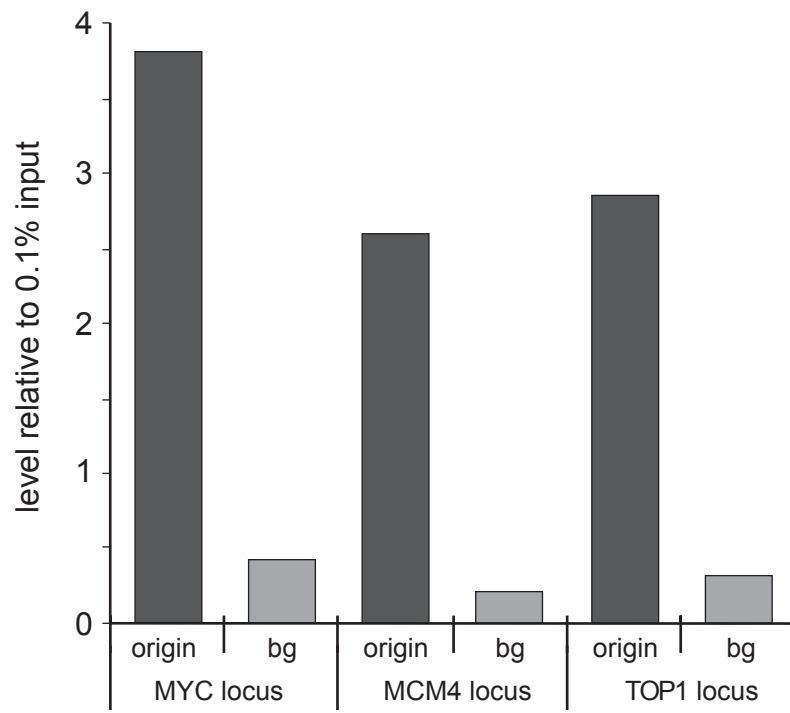

Figure S2

# A

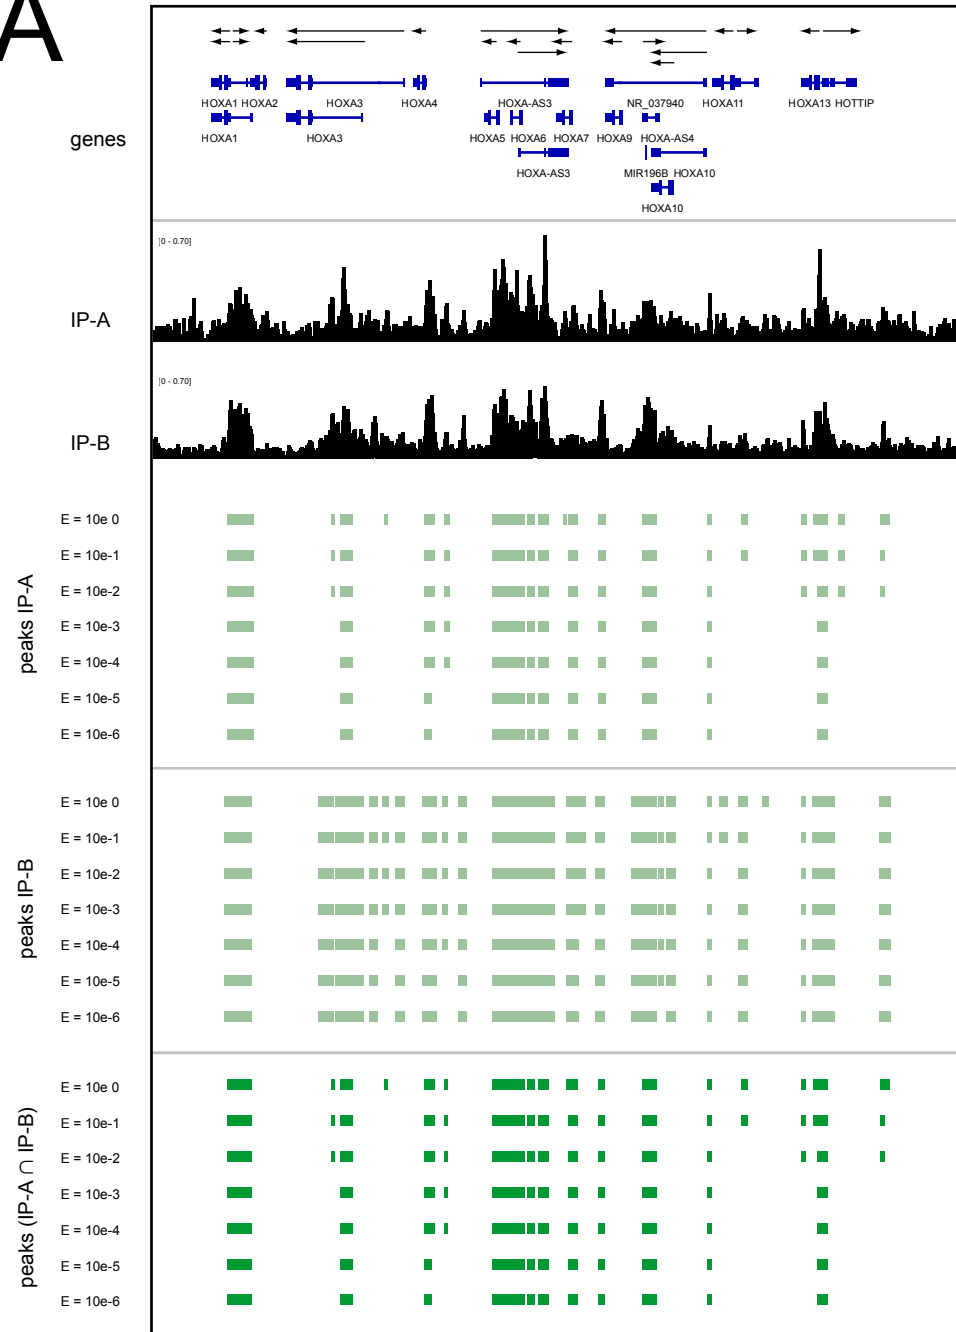

# B

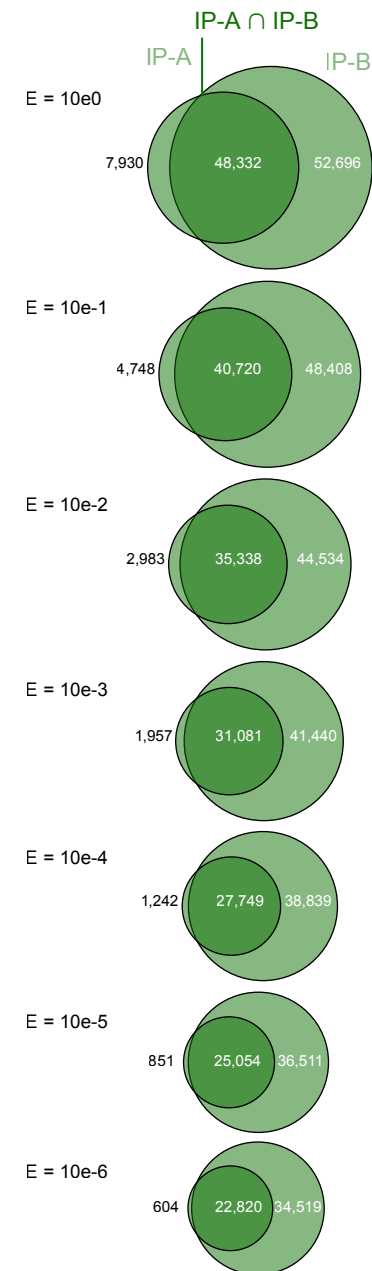

Figure S3

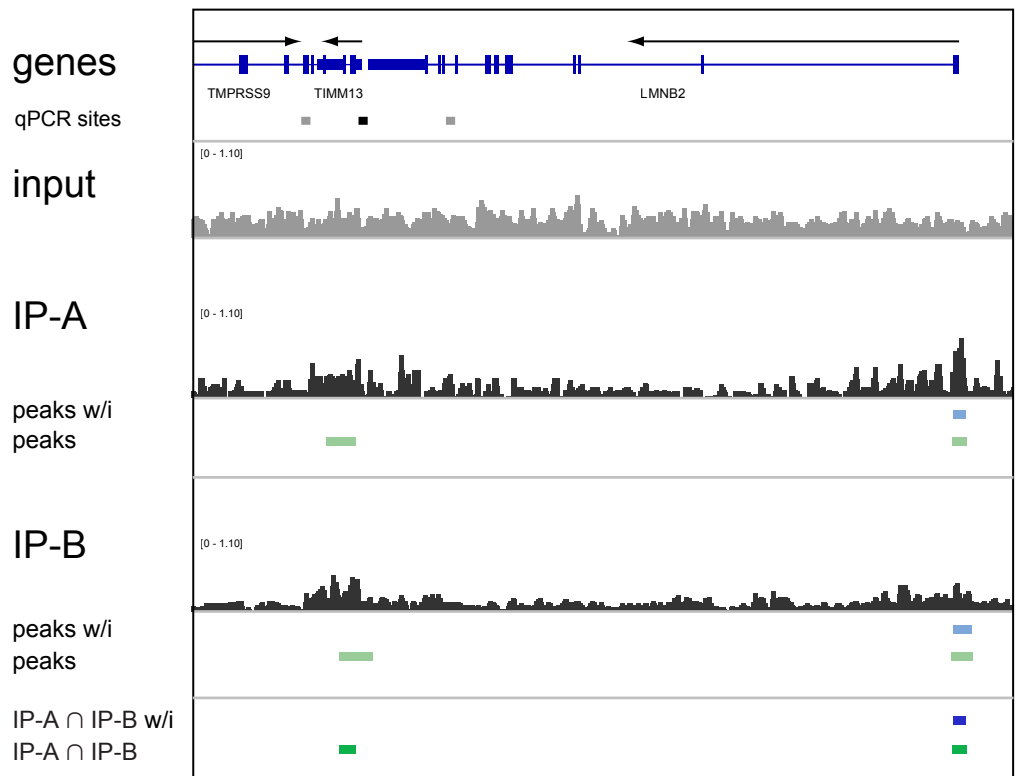

Figure S4

**A**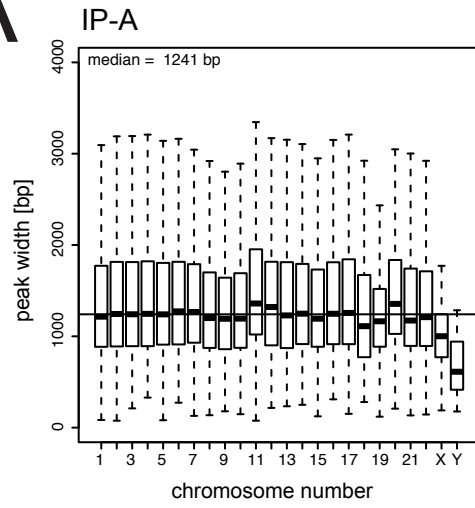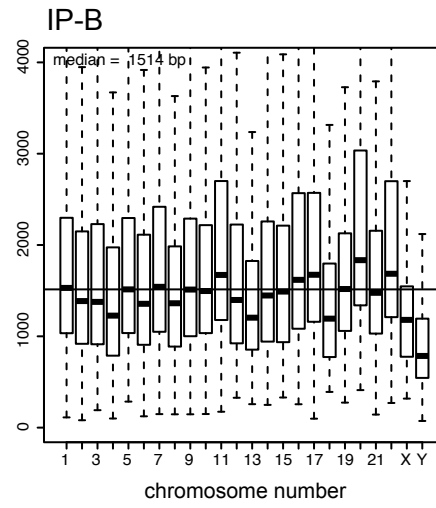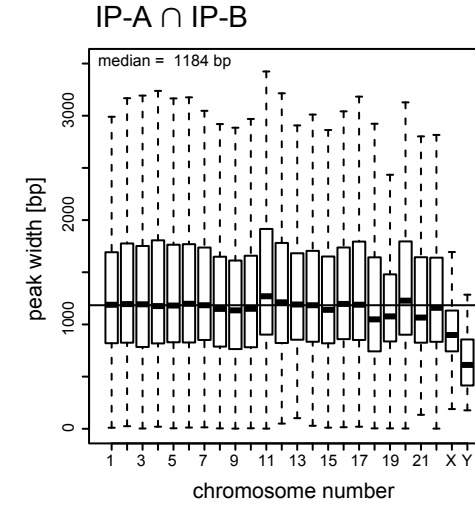**B**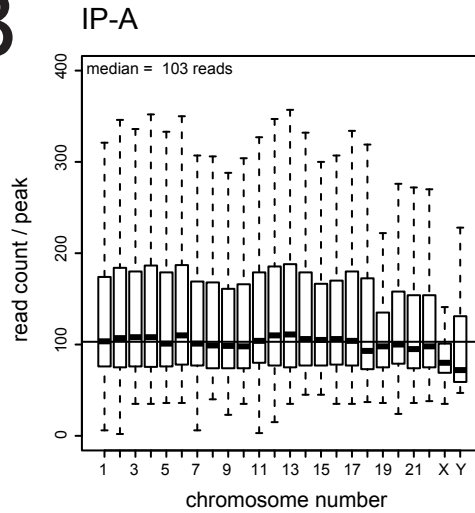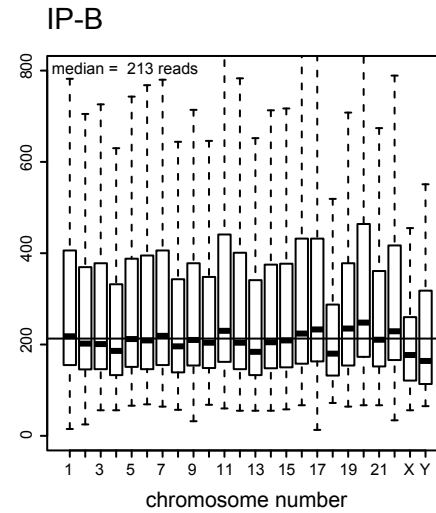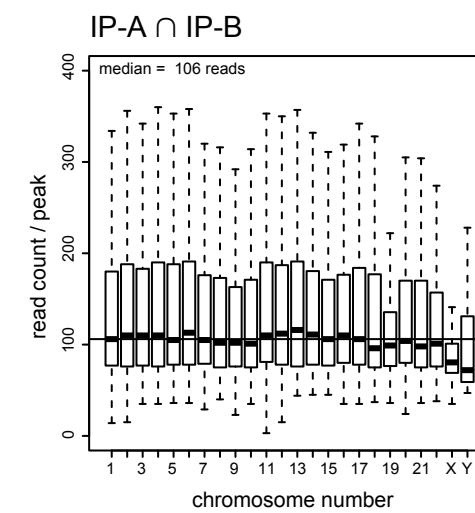

Figure S5

# A

origin sites

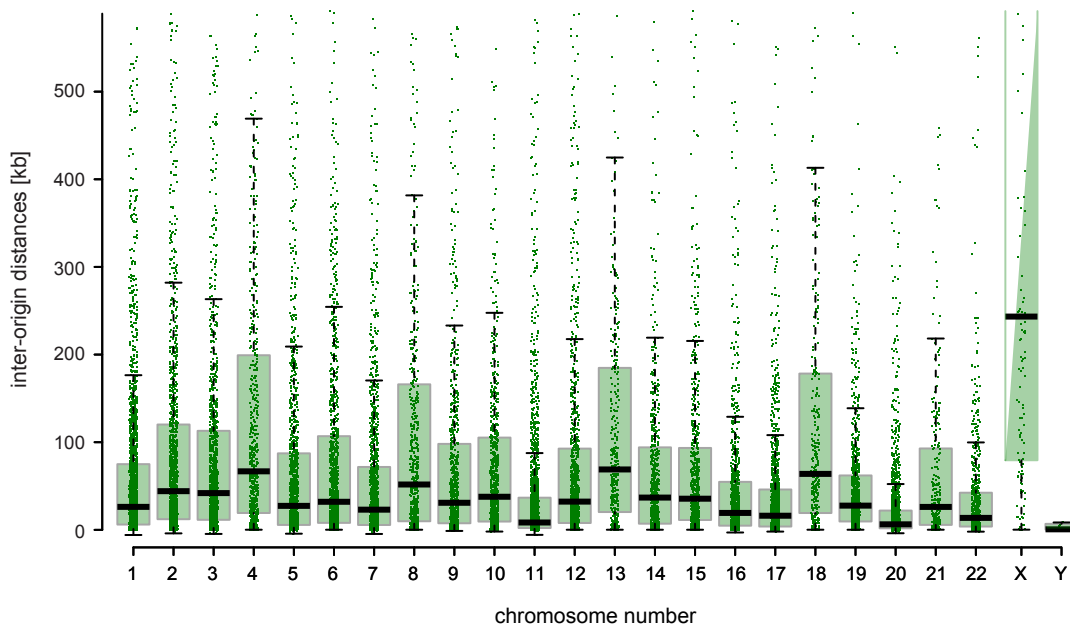

# B

randomised origin sites

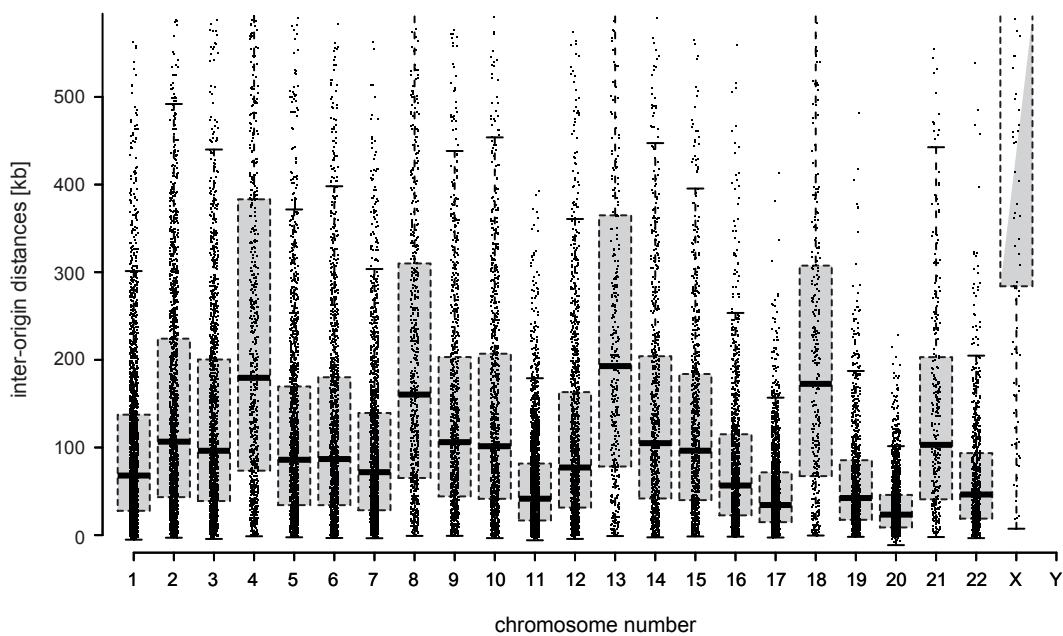

Figure S6

chromosome 17: 73,040 - 74,100kb

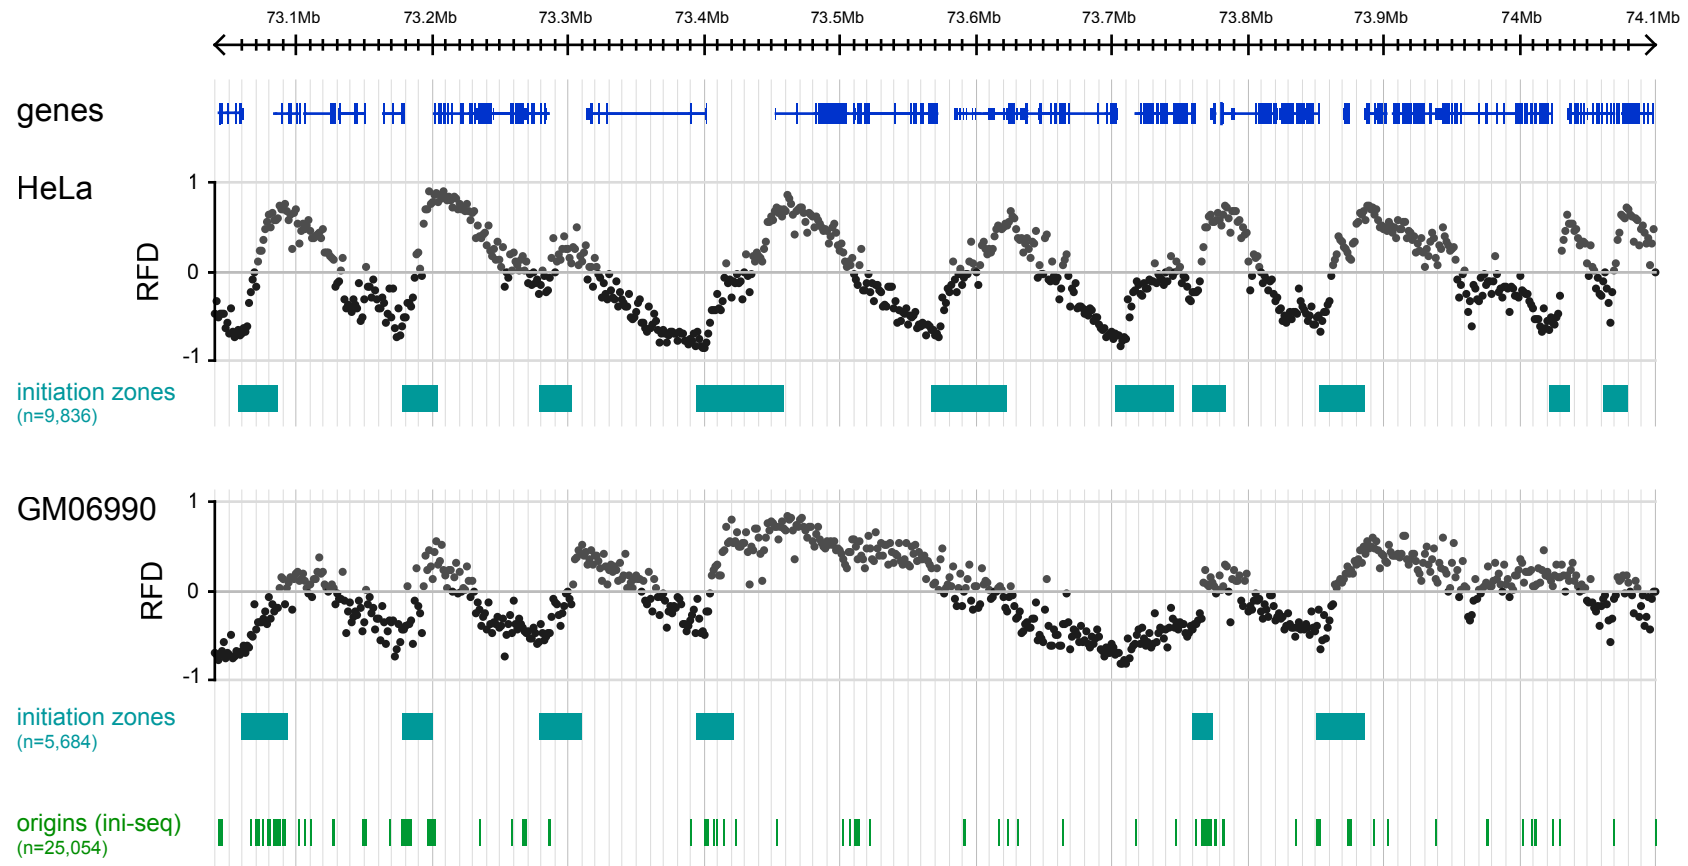

Figure S7

# A

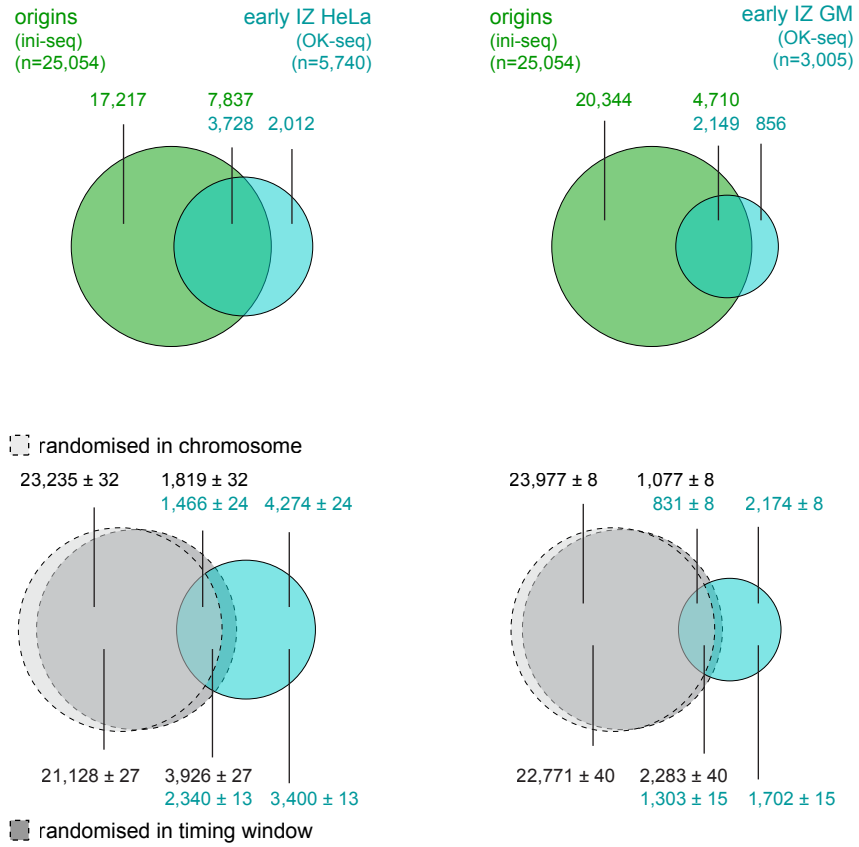

# B

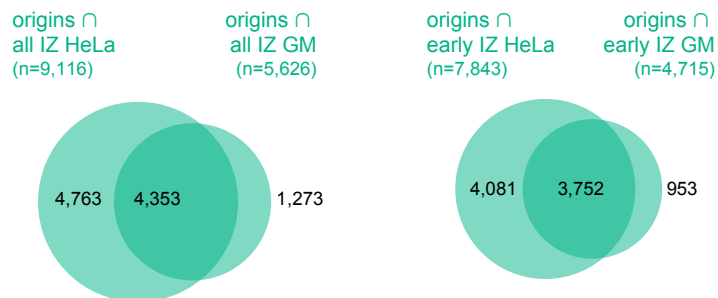

Figure S8



**Table S1**

| Primer location          | Primer sequence 5'–3'    |
|--------------------------|--------------------------|
| MYC ori F                | ACCAAGACCCCTTTAACTCAAGA  |
| MYC ori R                | CCTCGTCGCAGTAGAAATACG    |
| MYC background site B F  | GCCCCATCCCTTAGTGACAA     |
| MYC background site B R  | GTTTGCTGTCAGGCTTTTGG     |
| MCM4 ori F               | TTGGGTGGCTACTTGGTGTT     |
| MCM4 ori R               | GACCGCGTTTGTGCTTTTT      |
| MCM4 background site B F | TCAAGAAGGCACTTTCGTATAAAT |
| MCM4 background site B R | AAGGCATGTCAGATTAGCAAAG   |
| TOP1 ori F               | CCTTATGCAAATCACAGCGGAG   |
| TOP1 ori R               | CGCTTTTAAACAACACGTCGG    |
| TOP1 background site B F | CAAAATTGGGCTGTGAGTTTT    |
| TOP1 background site B R | TTTCCATACCATTAGCAGCAGG   |
| Peak site P1 F           | GACGCAGCTAGACCTTGGC      |
| Peak site P1 R           | CGACACTCACCCGCATCTC      |
| Peak site P2 F           | CCTCCCTTGGCTCTTACTGTTT   |
| Peak site P2 R           | GAGGTGCAGTGATAAACGAAGC   |
| Peak site P3 F           | GCGGATAGATACAGAAACGTAGG  |
| Peak site P3 R           | AAAAGTCTTGGGTGCAGGGTAT   |
| Peak site P4 F           | TTCTTTGCTGAACACACGG      |
| Peak site P4 R           | GTTCCCGCCACCTATCCTC      |
| Peak site P5 F           | GGACTCAGACAAACCAAGAGC    |
| Peak site P5 R           | CATGGTAGTGTGCCAAACA      |
| Peak site P6 F           | TGGA CTCTGTTGACTCACTC    |
| Peak site P6 R           | CACCTGTGCGCTTTGTTTCAT    |
| Peak site P7 F           | GGAAAGTGGATGGAAAGTGCAT   |
| Peak site P7 R           | GCCCAGCAATAGAAACGTTGAA   |
| Peak site P8 F           | ATCTCACAAGTCAGTCAGCCAA   |
| Peak site P8 R           | TTGTCACCCTGTCTGCGTC      |
| Peak site P9 F           | TAAGCACACCACTACTTGCCA    |
| Peak site P9 R           | ACAATTCAGAGACGAGGGGAC    |
| Peak site P10 F          | AGGCTGACACTTTCCCATCTT    |
| Peak site P10 R          | ACGTTCCCTTAGGTGGTGGTTT   |
| Peak site P11 F          | GAGAACTCGGGGTCTGGC       |
| Peak site P11 R          | CGGCGTCAGTCTGGGATTG      |
| Peak site P12 F          | GGTGGGAAACGAAGATGAAAAGT  |
| Peak site P12 R          | CTAGTAAAATCTGTGGGGAAGCC  |
| Peak site P13 F          | GAATCCACATCCCCAGCAGAAG   |
| Peak site P13 R          | CTCGGGTAAGCGGGCTAG       |
| Peak site P14 F          | GAAGACGAGATGAGGGAGCTG    |
| Peak site P14 R          | CTACTCTCTCCCTGTTCTGCT    |
| Peak site P15 F          | GCGTTGTCACCAGCAATC       |
| Peak site P15 R          | ATTCATTGCGCAGCTATTTCGG   |
| Peak site P16 F          | CCCAGGATGCAGTTTGTGTC     |
| Peak site P16 R          | GCATTCCCTCGGCCATTTT      |
| Background site B1 F     | GGTGTGCTTAGGTTGGAAC      |
| Background site B1 R     | TAGGCCGACTCTCATACTTCA    |
| Background site B2 F     | CCTCTCAAGTACCCTCTGCAAT   |
| Background site B2 R     | TTTCATGCAACCCCAACACTT    |
| Background site B3 F     | TAGCTGCCCTTAAACACATTGC   |
| Background site B3 R     | TCAAAGAAGCTCAGGTATCCCC   |
| Background site B4 F     | ACCAGTTTCAGGATAAGGCTGT   |
| Background site B4 R     | GCTATCACCTGCTGTTTCTTGG   |
| Background site B5 F     | CCTCACGTCGTCTAACACCAAT   |
| Background site B5 R     | GAAGACACCAACCTGCCTGTAA   |
| Background site B6 F     | TTATGGGGATGGGGAAAGACAG   |
| Background site B6 R     | CACTGAGGGAGGGCTCTTAATT   |

## Supplementary figure legends

**Figure S1. Specificity of immunoprecipitation of nascent DNA.** Nuclei from late G1 phase human EJ30 cells were incubated in a human cell-free DNA replication initiation system in the presence or absence of digoxigenin-dUTP. After fragmentation, DNA fragments were immunoprecipitated with non-conjugated agarose beads (mock IP) or anti-digoxigenin IgG-conjugated beads (dig IP). The amount of bead-associated DNA was quantified by the Qubit dsDNA HS Assay kit (Invitrogen). Data are expressed as proportions of 0.1% amount of input DNA, mean values of triplicate determinations are shown for one IP experiment.

**Figure S2. Immunoprecipitation of nascent DNA.** Nuclei from late G1 phase human HeLa cells were incubated in a human cell-free DNA replication initiation system, and nascent digoxigenin-labelled nascent DNA was isolated by immunoprecipitation with anti-digoxigenin IgG after fragmentation by sonification. The abundance of immunoprecipitated nascent DNA was quantitated by real-time PCR as detailed for Fig. 2A, using primer pairs located at the replication origins located near the promoters of the *MYC*, *MCM4* and *TOP1* loci, and at corresponding non-origin background sites (bg). Primer positions are shown in Fig. 2B.

**Figure S3. Stringency of SICER peak calling.** Peak calling and intersect analysis was performed by SICER excluding the input library for the indicated E-values. (A) Analysis of peak location for descending E-values. Analysis was performed for the HOX gene cluster locus on chromosome 7p15. Positions of reference genes and their transcription direction are indicated. Enrichment peaks called for immunoprecipitated DNA libraries A and B (IP-A and IP-B; light green) and the overlap between them ( $IP-A \cap IP-B$ ; dark green) are visualised on the integrated

genome viewer (IGV) for the indicated E-values. (A) Quantitative analysis of peak calling for descending E-values. Venn diagrams are shown for enrichment peaks called for libraries A and B (IP-A and IP-B) and the overlap between them ( $IP-A \cap IP-B$ ). Numbers of determined peaks are given for each E-value.

**Figure S4. Ini-seq analysis of the laminB2 replication origin.** Nascent DNA was isolated by immunoprecipitation and subjected to deep sequencing. The positions of sequencing reads are visualised on the integrated genome viewer (IGV) on a 40kb section of chromosome 19p13.3 (2.42-2.46Mb) for the total input control DNA (input) and two independent biological replicates of immunoprecipitated nascent DNA (IP-A and IP-B). Peaks of nascent DNA enrichment were called by SICER, both by integrating input DNA (w/i; blue bars), or not integrating input DNA (green bars). The areas of peaks present in both IP-A and IP-B (i.e. the intersect) are shown for both peak calling strategies (bottom row). Positions of reference genes and transcription direction are indicated. Positions of primer pair sites used for qPCR analyses reported previously (Keller et al., Nucl. Acids Res. 30, 2114-2123 (2002)) are indicated (black, origin sites; grey, background sites).

**Figure S5. Comparison of origin peak widths and read counts between individual libraries.** Origin peaks of immunoprecipitated nascent DNA were called by SICER excluding the input library. Data for immunoprecipitated nascent DNA libraries A (IP-A) and B (IP-B) are shown on the left and in the middle, respectively, while data for the overlap between them ( $IP-A \cap IP-B$ ) are shown on the right. (A) Distributions of peak widths for each human chromosome. (B) Distributions of accumulated sequencing read counts per peak for each human chromosome. Box and whisker plots without individual outliers are plotted, whiskers represent 1.5 times

the interquartile range above the upper quartile and below the lower quartile, and overall medians are indicated for each panel.

**Figure S6.** Distributions of inter-origin distances for the original (green) and a control distributions after randomisation within each chromosome (grey). Individual inter-origin distances are shown as scatter plots for each chromosome, overlaid on a box-and-whisker plot representation of the same data set. Only origin peaks present in both IP libraries (i.e. the intersects of IP-A and IP-B) were used. (A) Inter-origin distances of origin sites called by SICER at  $E=0.00001$ . (B) Inter-origin distances of the control distribution with randomised sites for each chromosome.

**Figure S7.** Comparison of origin sites identified by ini-seq with replication fork directionality profiles determined by Okazaki fragment sequencing (OK-seq). Raw data are plotted for replication fork directionality (RFD; forward strand for values  $>0$ , reverse strand for values  $<0$ ) for HeLa and GM06990 cells, obtained from the OK-seq analysis by Petryk and co-workers, ([http://157.136.54.88/cgi-bin/gbrowse/gbrowse/okazaki\\_ref/](http://157.136.54.88/cgi-bin/gbrowse/gbrowse/okazaki_ref/)). Ascending segments in the RFD profiles representing DNA replication initiation zones are indicated by light blue bars for both cell lines. Positions of origins determined by ini-seq are indicated by green bars. The same genomic location is analysed as shown in Fig. 5a of the OK-seq analysis paper (Petryk et al., Nat. Commun. 7; doi: 10.1038/ncomms10208 (2016)).

**Figure S8.** Overlap analysis of origin sites identified by ini-seq with early replicating initiation zones identified by OK-seq. (A) Top row: Venn diagram analysis of replication origins determined by ini-seq (green) with early replicating initiation zones (IZ) determined by OK-seq (light blue) in HeLa (left) and GM06990 cells (right). Early replicating initiation zones were selected as the intersect of initiation zones

determined by OK-seq (Petryk et al., Nat. Commun. 7; doi: 10.1038/ncomms10208 (2016)) with the early replicating domain S1 taken from (Dellino et al., Genome Res. 23, 1-11 (2013)). Bottom row: overlap analysis of control sites after randomisation within each chromosome (dashed light grey) or within DNA replication timing windows (dashed dark grey) with early replicating initiation zones (light blue). Overlays of Venn diagrams are shown for these two analyses. Absolute numbers of origins/control sites and initiation zones are indicated for each section of the Venn diagrams. (B) Overlap analysis of origins detected by ini-seq present in genome-wide IZs (left) and early replicating IZs (right) in HeLa cells with those in GM06990 cells.

**Table S1.** PCR primers used in this study.

**Table S2.** Genomic coordinates of human DNA replication origins identified by ini-seq. Determination by SICER at  $E = 10e-1$ .

**Table S3.** Genomic coordinates of human DNA replication origins identified by ini-seq. Determination by SICER at  $E = 10e-5$ .
